# Supplementary material
Source: publisher figshare collection journal article supplement (https://acs.figshare.com/ndownloader/files/28730544)
Supplement: Supplementary file 1 [file 28730544]

**Supporting Information:**  
**On-Chip Generation of Ultrafast Current Pulses**  
**by Nanolayered Spintronic Terahertz Emitters**

Wolfgang Hoppe,<sup>†</sup> Jonathan Weber,<sup>†</sup> Saban Tirpanci,<sup>†</sup> Oliver Gueckstock,<sup>‡</sup>  
Tobias Kampfrath,<sup>‡</sup> and Georg Woltersdorf<sup>\*,†</sup>

<sup>†</sup> *Institute of Physics, University of Halle, von Danckelmann Platz 3, 06120 Halle,  
Germany*

<sup>‡</sup> *Institute of Physics, Freie Universität Berlin, Arnimallee 14, 14195 Berlin, Germany*

E-mail: [georg.woltersdorf@physik.uni-halle.de](mailto:georg.woltersdorf@physik.uni-halle.de)

## Supporting Fig. S1

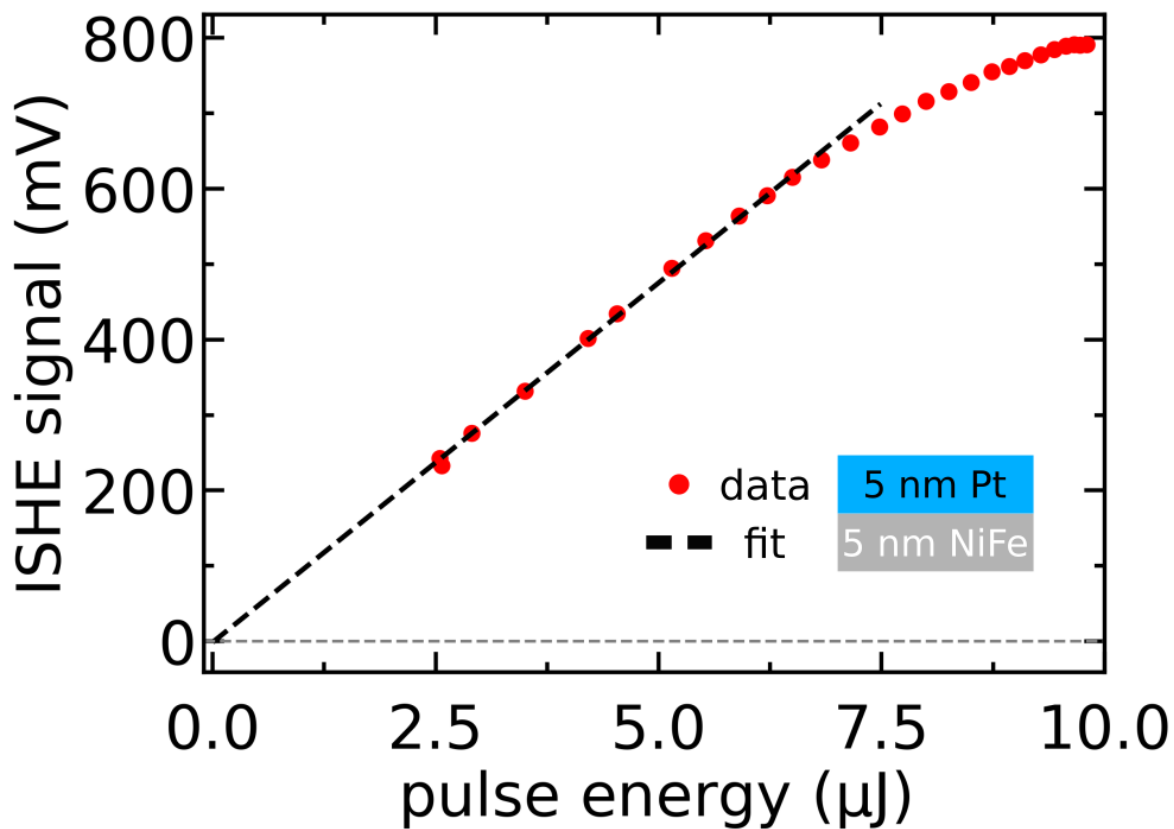

Figure S1: Dependence of the extracted ISHE amplitude on the used pump pulse energy for the  $\text{Ni}_{80}\text{Fe}_{20}(5\text{ nm})/\text{Pt}(5\text{ nm})$  stack. Up to  $\sim 7.5\ \mu\text{J}$  it is increasing linearly while saturating afterwards. Data points are marked as red dots and a linear fit up to  $7.5\ \mu\text{J}$  with a black dashed line.

## Supporting Fig. S2

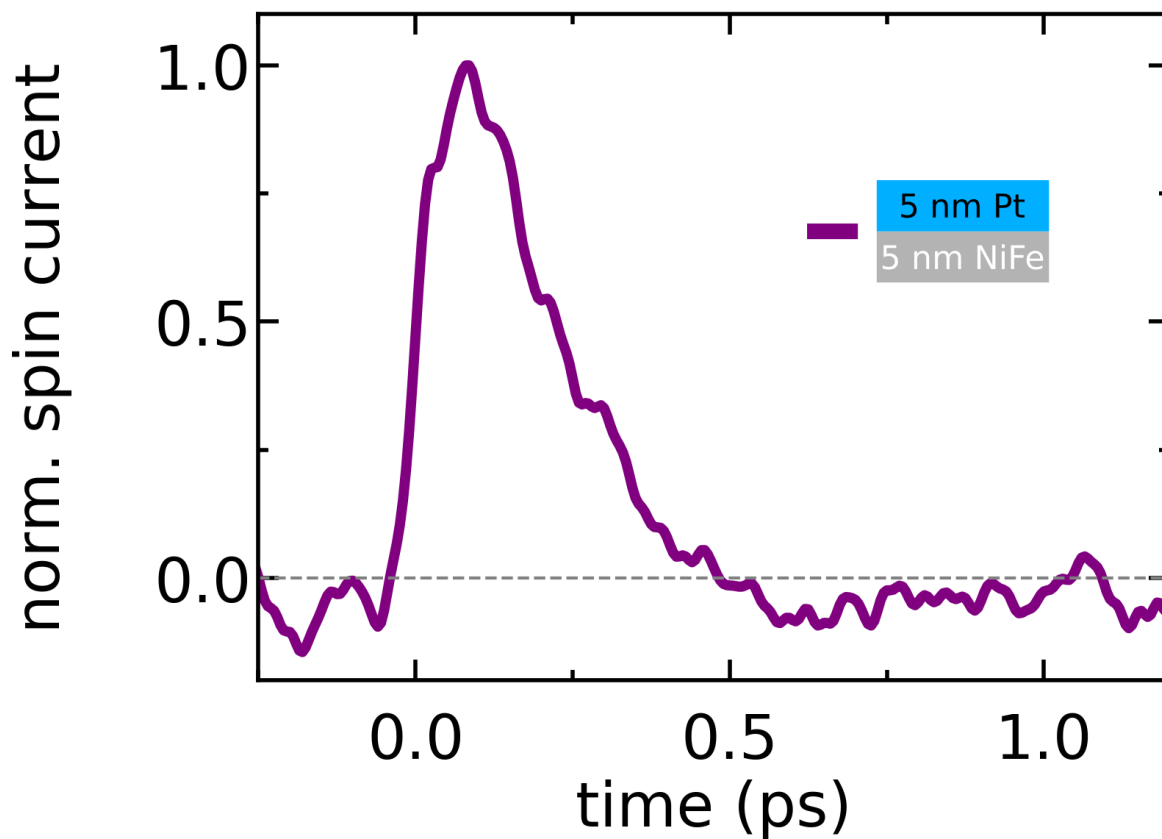

Figure S2: Normalized spin current extracted out the THz data for the  $\text{Ni}_{80}\text{Fe}_{20}(5\text{ nm})/\text{Pt}(5\text{ nm})$  stack. Its FWHM of  $\sim 250\text{ fs}$  is the time scale for the underlying effect.

Supporting Fig. S3

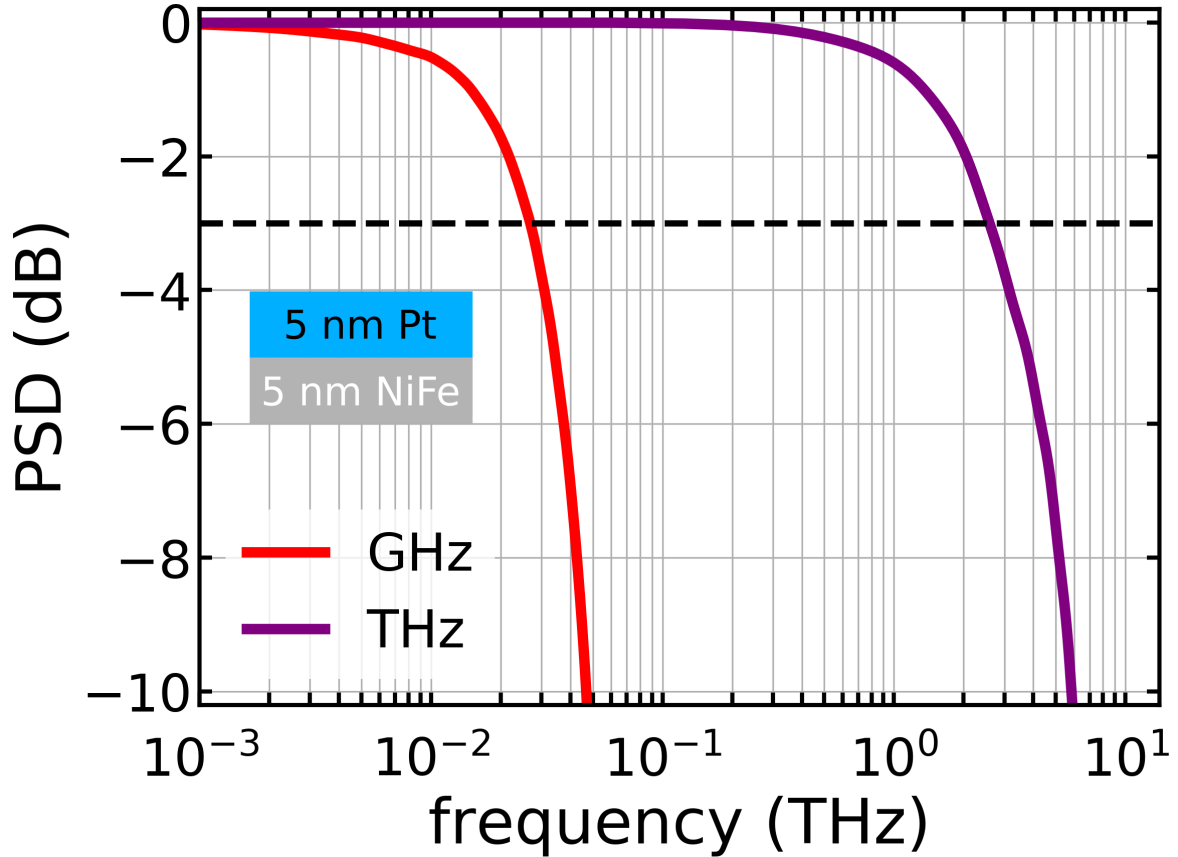

Figure S3: Power spectra of the detected signals shown in Fig. 3a) (GHz) and Fig. 4b) (THz): The electrically measured signal (red solid line) and the signal measured by electro-optic sampling (purple solid line). Threshold frequencies for a loss of  $-3$  dB in PSD are  $\sim 25$  GHz for the GHz regime and  $\sim 3$  THz for the THz regime.
